# Supplementary material
Source: Frontiers journal article supplement (https://www.frontiersin.org/articles/322617)
Supplement: Image_1.pdf [file Image_1.pdf]

## Supplementary Material

### Setting up decision-making tools towards a quality-oriented participatory maize breeding program

#### Authors

Mara Lisa Alves<sup>1</sup>, Cláudia Brites<sup>2</sup>, Manuel Paulo<sup>2</sup>, Bruna Carbas<sup>3</sup>, Maria Belo<sup>1</sup>, Pedro Mendes-Moreira<sup>2</sup>, Carla Brites<sup>3</sup>, Maria do Rosário Bronze<sup>1, 4, 5</sup>, Jerko Gunjača<sup>6,7</sup>, Zlatko Šatović<sup>6,7</sup>, Maria Carlota Vaz Patto<sup>1\*</sup>

#### Correspondence

\*Corresponding author: [cpatto@itqb.unl.pt](mailto:cpatto@itqb.unl.pt)

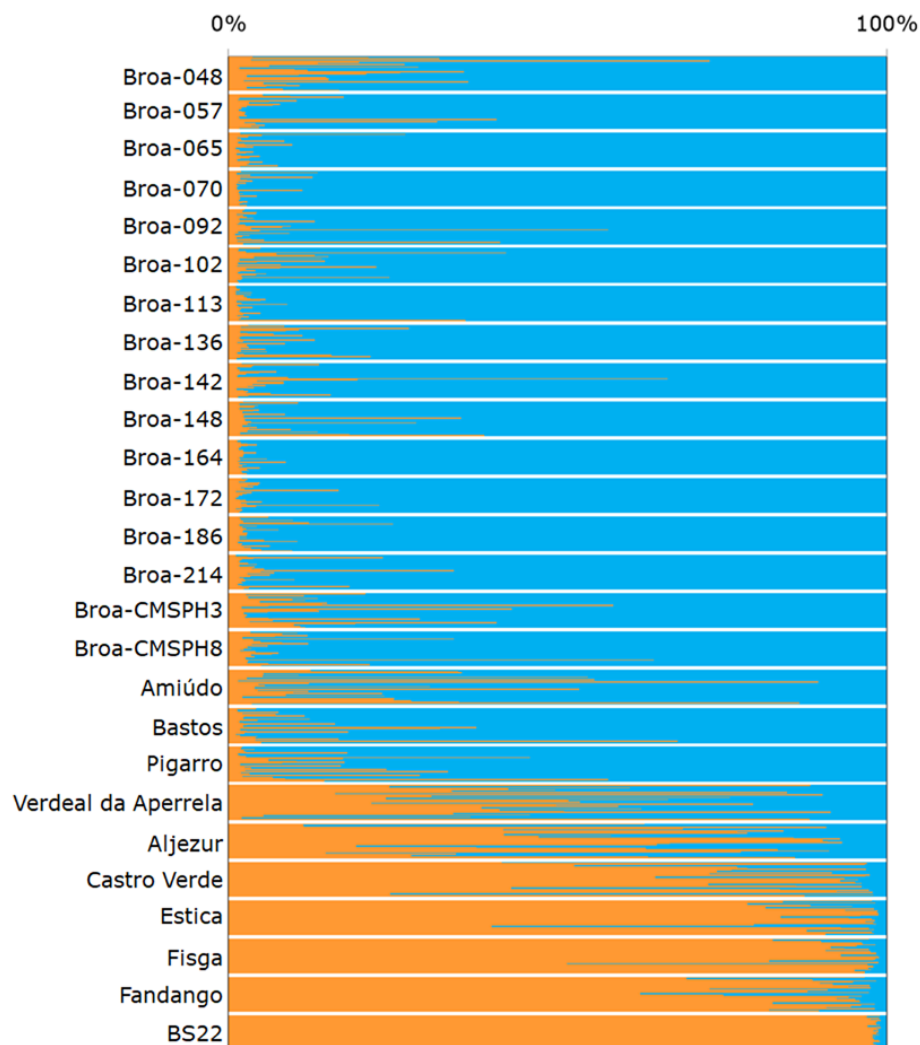

Figure S1. Proportion of membership of each maize population in each of the two gene pools inferred from multi-locus microsatellite data using a model-based clustering method. Each horizontal line within each population corresponds to an individual plant. Gene pool A is depicted in blue; gene pool B is depicted in orange. The *BS22(R)C6* synthetic population from the US, abbreviated for *BS22* in the figure.
